# Supplementary material for: Effect of Electrode Type on Electrospun Membrane Morphology Using Low-Concentration PVA Solutions
Source: MDPI journal article supplement (doi:10.3390/membranes12060609), 2022-06-11
Supplement: s1 [file s1]

## Supplemented material

# Effect of Electrode Type on Electrospun Membrane Morphology Using Low-Concentration PVA Solutions

Zane Zelca<sup>a,\*</sup>, Andres Krumme<sup>b</sup>, Silvija Kukle<sup>a</sup>, Mihkel Viirsalu<sup>b</sup>, Laimdota Vilcena<sup>a</sup>

<sup>a</sup>*Institute of Design technology, Faculty of Materials Science and Applied Chemistry, Riga Technical University, Latvia;*

<sup>b</sup>*Laboratory of Polymers and Textile Technology, Department of Materials and Environmental Technology, Tallinn University of Technology, Estonia.*

\* Corresponding author – Zane.Zelca@rtu.lv, Riga Technical University, Kipsala street 6, Riga, Latvia

Scanning electron microscope SEM Mira Tescan and optical microscope Zeiss Axioskop-2 used for S.1. and S.2. micrographs imaging. Electrospun fiber webs are spun from the solutions described in the table below.

### PVA solutions preparation and designations

| Sample   | Molar weight, kDa | PVA content in solution, wt% | Mixing temp., °C | Stirring Time, h |
|----------|-------------------|------------------------------|------------------|------------------|
| 6PVA125  | 125               | 6                            | 90-100           | 2                |
| 8PVA125  |                   | 8                            |                  |                  |
| 10PVA125 |                   | 10                           |                  |                  |
| 6PVA130  | 130               | 6                            | 75-90            |                  |
| 8PVA130  |                   | 8                            |                  |                  |
| 10PVA130 |                   | 10                           |                  |                  |
| 6PVA145  | 145               | 6                            | 90-110           | 5-13             |
| 8PVA145  |                   | 8                            |                  |                  |
| 10PVA145 |                   | 10                           |                  |                  |

### S.1. The micrographs of the optical microscope, x500 and x100

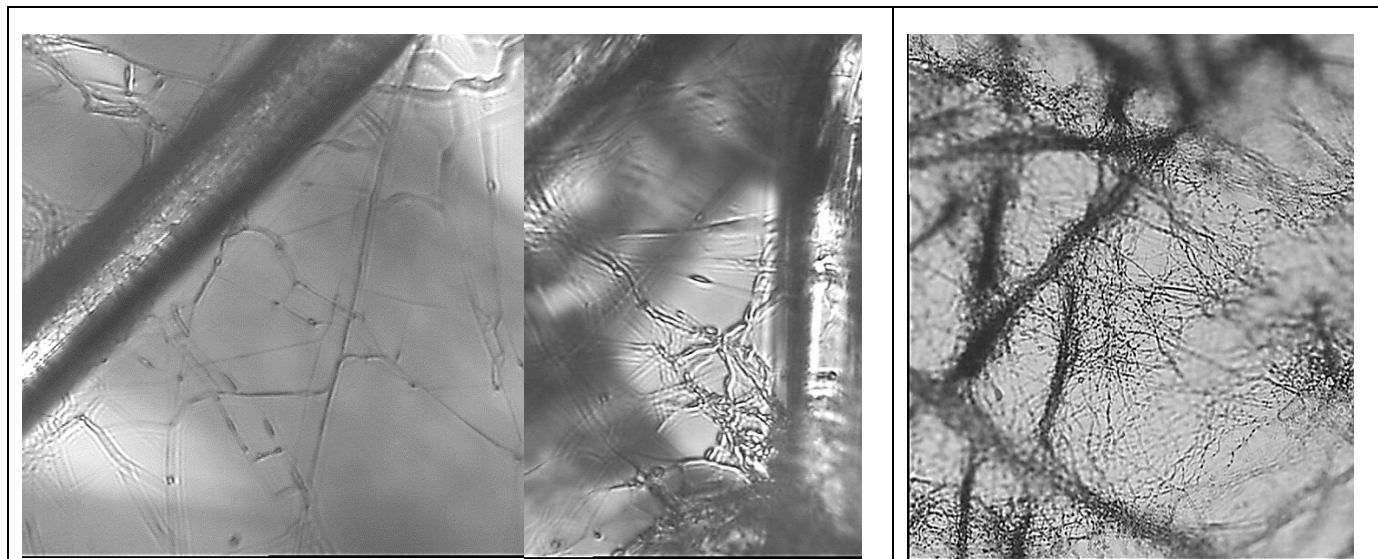

The solution 6PVA130 electrospun by: single wire electrode (left) and needle-type electrode (right)

S.2. Nanoweb morphology depend on concentration and molecular weight, electrospun with cylinder-type electrode

| PVA           | 6 wt%                                                                                                                                                           | 8 wt%                                                                                                                                                            | 10 wt%                                                                                                                                                            |
|---------------|-----------------------------------------------------------------------------------------------------------------------------------------------------------------|------------------------------------------------------------------------------------------------------------------------------------------------------------------|-------------------------------------------------------------------------------------------------------------------------------------------------------------------|
| 125.000 g/mol | 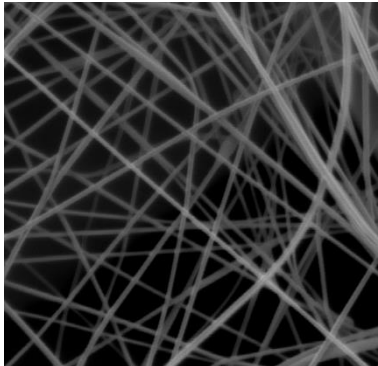 <p>Vac: HiVac<br/>Date(m/d/y): 04/14/21<br/>5 μm</p> <p>MIRA\\ TESCAN</p>     |  <p>Vac: HiVac<br/>Date(m/d/y): 04/14/21<br/>5 μm</p> <p>MIRA\\ TESCAN</p>     |  <p>Vac: HiVac<br/>Date(m/d/y): 04/14/21<br/>5 μm</p> <p>MIRA\\ TESCAN</p>     |
|               |  <p>Vac: HiVac<br/>Date(m/d/y): 04/14/21<br/>100 μm</p> <p>MIRA\\ TESCAN</p>  |  <p>Vac: HiVac<br/>Date(m/d/y): 04/12/21<br/>100 μm</p> <p>MIRA\\ TESCAN</p>  |  <p>Vac: HiVac<br/>Date(m/d/y): 04/14/21<br/>100 μm</p> <p>MIRA\\ TESCAN</p>  |
| 130.000 g/mol |  <p>Vac: HiVac<br/>Date(m/d/y): 04/29/21<br/>5 μm</p> <p>MIRA\\ TESCAN</p>   |  <p>Vac: HiVac<br/>Date(m/d/y): 04/29/21<br/>5 μm</p> <p>MIRA\\ TESCAN</p>   |  <p>Vac: HiVac<br/>Date(m/d/y): 04/29/21<br/>5 μm</p> <p>MIRA\\ TESCAN</p>   |
|               |  <p>Vac: HiVac<br/>Date(m/d/y): 04/29/21<br/>100 μm</p> <p>MIRA\\ TESCAN</p> |  <p>Vac: HiVac<br/>Date(m/d/y): 04/29/21<br/>100 μm</p> <p>MIRA\\ TESCAN</p> |  <p>Vac: HiVac<br/>Date(m/d/y): 04/29/21<br/>100 μm</p> <p>MIRA\\ TESCAN</p> |



| PVA           | 6 wt%                                                                                                                                              | 8 wt%                                                                                                                                                                                                                   | 10 wt%                                                                                                                                               |
|---------------|----------------------------------------------------------------------------------------------------------------------------------------------------|-------------------------------------------------------------------------------------------------------------------------------------------------------------------------------------------------------------------------|------------------------------------------------------------------------------------------------------------------------------------------------------|
| 145.000 g/mol | 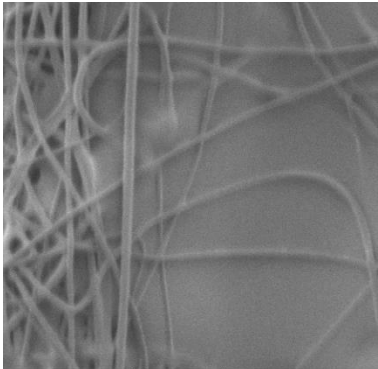 <p>Vac: HiVac<br/>Date(m/d/y): 04/29/21 5 μm MIRAI TESCAN</p>    |  <p>D1 = 0.60 μm<br/>D2 = 0.61 μm<br/>D3 = 0.48 μm<br/>D4 = 0.64 μm</p> <p>Vac: HiVac<br/>Date(m/d/y): 04/29/21 5 μm MIRAI TESCAN</p> |  <p>Vac: HiVac<br/>Date(m/d/y): 04/29/21 5 μm MIRAI TESCAN</p>    |
|               |  <p>Vac: HiVac<br/>Date(m/d/y): 04/29/21 100 μm MIRAI TESCAN</p> |  <p>Vac: HiVac<br/>Date(m/d/y): 04/29/21 100 μm MIRAI TESCAN</p>                                                                     |  <p>Vac: HiVac<br/>Date(m/d/y): 04/29/21 100 μm MIRAI TESCAN</p> |
